RESEARCH ARTICLE

# Ecological stoichiometry between leaves, litter and soil of dominant species in the forest community of rock-stream periglacial landforms in Mt. Laotudingzi

Lan Wang, Daqi Liu<sup>ID</sup>\*

School of Geography, Liaoning Normal University, Dalian, China

\* [bigqidq@foxmail.com](mailto:bigqidq@foxmail.com)

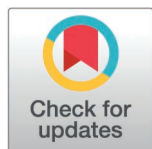

## OPEN ACCESS

**Citation:** Wang L, Liu D (2025) Ecological stoichiometry between leaves, litter and soil of dominant species in the forest community of rock-stream periglacial landforms in Mt. Laotudingzi. PLoS One 20(8): e0328983. <https://doi.org/10.1371/journal.pone.0328983>

**Editor:** Yang Yang, Western Carolina University, UNITED STATES OF AMERICA

**Received:** April 3, 2025

**Accepted:** July 9, 2025

**Published:** August 26, 2025

**Copyright:** © 2025 Wang, Liu. This is an open access article distributed under the terms of the [Creative Commons Attribution License](https://creativecommons.org/licenses/by/4.0/), which permits unrestricted use, distribution, and reproduction in any medium, provided the original author and source are credited.

**Data availability statement:** All relevant data are within the paper and its [Supporting Information](#) files.

**Funding:** The author(s) received no specific funding for this work.

## Abstract

This study investigates the ecological stoichiometric characteristics of carbon (C), nitrogen (N), and phosphorus (P) across the leaf-litter-soil continuum in the block stream forest community of Laotudingzi Mountain, a representative paleo-periglacial landform in northeastern China. Utilizing X-ray fluorescence spectroscopy (XRF), we analyzed 13 dominant tree species (10 broadleaf, 3 coniferous) to unravel nutrient limitation mechanisms and cross-media coupling in this oligotrophic cryogenic ecosystem. Results indicate that P is the primary limiting nutrient, with mean N: P ratios in leaves (12.84), litter (11.25), and soil (8.05) below the global threshold for P limitation (N: P < 14). Cross-media stoichiometric feedbacks reveal efficient P cycling: leaf N: P ratios show significant positive correlations with litter P content ( $R = 0.557$ ,  $P < 0.05$ ) and negative correlations with litter C: P ratios ( $R = -0.581$ ,  $P < 0.05$ ), while synchronized P dynamics between litter and soil ( $R = 0.538$ ,  $P < 0.1$ ) underscore litter decomposition as the primary driver of soil P replenishment. Adaptive nutrient strategies emerge through stoichiometric plasticity, where accelerated P mineralization via low C: P ratios (342.88) compensates for C-N cycling inefficiencies despite inhibitory litter C: N ratios (32.3). These findings highlight the biogeochemical resilience of periglacial forests and provide critical insights for mitigating P limitation, guiding species selection in restoration, and optimizing litter management to enhance ecosystem stability under climate change.

## 1 Introduction

Ecological stoichiometry, as an interdisciplinary framework for deciphering elemental cycling and energy fluxes in ecosystems, focuses on the biogeochemical coupling mechanisms of C, N, and P [1,2]. N and P, as the key limiting elements in terrestrial ecosystems, regulate plant photosynthesis, metabolic pathways, and community succession through synergistic or antagonistic interactions [3]. In forest ecosystems,

**Competing interests:** The authors have declared that no competing interests exist.

C, N, and P form dynamic cycling chains via the “plant-litter-soil” continuum: plants fix C through photosynthesis; litter acts as the primary vector for nutrient return, reintroducing C, N, and P into soil via decomposition; while soil physicochemical properties inversely modulate plant nutrient uptake efficiency [4–6]. This cycling process is governed by multi-scale controls including temperature, humidity, and microbial activity, with its underlying mechanisms remaining a central focus of ecological research [7,8].

Ecological stoichiometry is a science that studies the energy balance and multiple chemical element balance of biological systems. It provides a comprehensive method for studying the coupling relationship of C, N, P and other elements in ecosystem processes [9]. N and P are the main limiting elements of natural terrestrial ecosystems. They play an important role in various physiological and metabolic activities during plant growth. They are independent of each other and influence each other, and affect the C fixation of plant leaves. The C, N, and P cycles within the ecosystem are transformed between plants, litter, and soil [10]. The study on the ecological stoichiometric characteristics of plant-litter-soil in forest ecosystems is of great theoretical and practical significance. Litter is a reservoir of organic C and N in forest ecosystems, and it is also a hub for material exchange between soil and plants [11]. Litter plays an important role in the storage of organic matter and nutrient cycling in forest ecosystems, and is one of the natural sources of forest soil fertility. The accumulation of soil organic matter and nutrients mainly comes from the return of various forms of litter [12]. Plants fix C through photosynthesis, transfer part of C to the soil, and gradually compensate C and nutrients to the soil in the form of litter [13]. The changes of soil nutrient supply, plant nutrient demand, self-regulation of plant nutrient demand and nutrient return during litter decomposition affect each other [14], which makes the study of nutrient content in ‘ plant-litter-soil ’ system very complicated [13]. As an ‘ ecological stoichiometry ’ for studying the energy and multi-element balance of biological systems, provides an effective means to reveal the stoichiometric relationships and laws of C, N, P and other elements in the ‘ plant-litter-soil ’ ecological process [14]. There have been many studies on the general characteristics of surface litter, plant or soil, but most of these studies take any one or both of litter, plant or soil as the research object, and the differences in the ecological stoichiometric characteristics of C, N and P in the ‘ plant-litter-soil ’ continuum and their internal correlations are still insufficient. The rock physical weathering process of the ancient periglacial landform in the mountainous area of eastern Liaoning leads to the slow rate of soil formation and the formation of a thin layer of coarse soil. Its low P availability constitutes a key geographical limiting factor for vegetation growth. Therefore, this paper chooses several dominant tree species in the ancient periglacial landform of Laotudingzi as the research object, and studies the relationship between litter and soil, which has important practical significance for revealing the interaction and balance relationship between C, N and P.

## 2 Study area

Laotudingzi National Nature Reserve, situated at the administrative boundary between Huanren Manchu Autonomous County (Benxi City) and Xinbin Manchu

Autonomous County (Fushun City) in Liaoning Province, spans geographic coordinates 124°41'13"E–125°5'15"E and 41°11'11"N–41°21'34"N, with a total area of 152.17 km<sup>2</sup> (Fig 1). The Laotudingzi paleo-periglacial area, with its main peak at 1,367.3 m a.s.l. and a relative relief of 867 m, constitutes a unique geomorphic unit in northeastern China. Characterized by a mid-temperate montane forest ecosystem, it sustains a forest coverage rate of 97%. The main peak and surrounding ridges are dotted with periglacial landforms spanning approximately 1,500 hectares [15]. Brown soils and dark brown soils alternate across the area, showing marked vertical zonation in soil thickness (summit: <30 cm; valley slopes: 30–60 cm). This region preserves transitional floristic characteristics between the Changbai Mountains and North China flora, including relict species such as *Neottianthe cucullata* [11,12]. The area exhibits pronounced vertical vegetation zonation: from 600 m a.s.l. to the summit, deciduous broadleaf forests, coniferous forests, mixed coniferous-broadleaf forests, dark coniferous forests, and dwarf *Betula ermanii* scrub communities form altitudinal sequences. Surface lithology features chaotic boulder accumulations, alongside retarded pedogenesis and localized soil horizon truncation, resulting in constrained vegetation succession and ecosystem fragility [10,16].

Climatologically classified as temperate continental monsoon, the reserve has a mean annual temperature of 6°C, annual precipitation of 827.8 mm (73% relative humidity), extreme temperatures ranging from 38°C to −33.2°C, and a frost-free period of 139 days. Enhanced orographic lifting by Pacific southeast monsoons drives pronounced summer rain-hot season coupling, yet high surface runoff coefficients (70%) and flashy hydrological responses characterize slope processes [11,17]. Soil profiles dominated by brown soils and mountain dark brown soils (30–60 cm thickness) exhibit loose structures and high organic matter content, classified into 2 soil orders, 3 suborders, and 7 soil families, providing

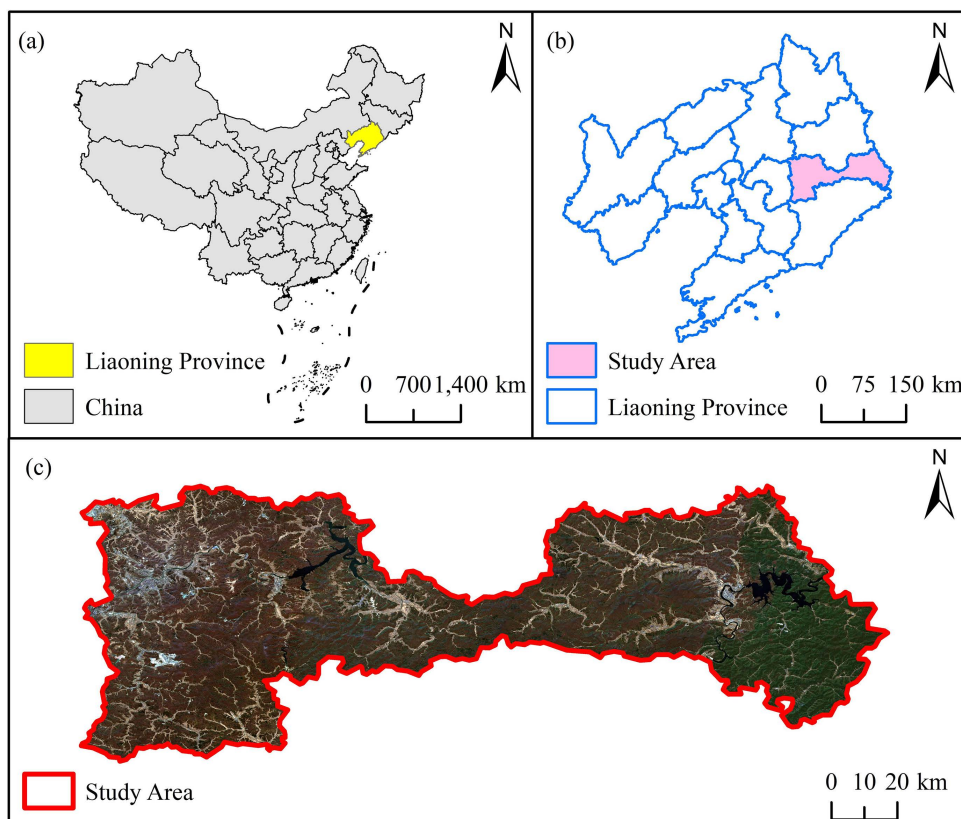

**Fig 1. Map of study area.** Shows the geographical location and topography of Laotudingzi Mountain.

<https://doi.org/10.1371/journal.pone.0328983.g001>

essential substrates for forest development. The region harbors exceptional biodiversity hotspots, including relict gymnosperms (*Taxus chinensis*, *Magnolia sieboldii*) and the globally endemic orchid *Neottianthe cucullata*. Its flora demonstrates transitional characteristics between the southwestern margin of the Changbai Mountain floristic region and the North China floristic region [16,10].

### 3 Sampling and analysis

Based on prior biogeographical investigations of the Changbai Mountains-North China floristic transition zone [10,18], 13 dominant tree species were identified in the Laotudingzi paleo-block stream forest community, including 10 broadleaf species (*Acer pseudo-Sieboldianum*, *Carpinus cordata*, *Tilia amurensis*, *Acer mono Maxim*, *Ulmus laciniata*, *Fraxinus mandschurica*, *Quercus mongolica*, *Acer barbinerve*, *Prunus serrulata*, *Betula ermanii*) and 3 coniferous species (*Abies nephrolepis*, *Pinus koraiensis*, *Abies holophylla*). Sampling was conducted in periglacial landform-concentrated areas (Dongpo Changzigou and Beipo Sandaogou valleys) using a stratified random approach. For each species, geospatial coordinates (WGS84), tree height, diameter at breast height, and crown architecture were recorded (Table 1). Foliage samples (4–8 canopy branches per tree) were stored in hermetic polyethylene bags for natural air-drying. Litter and soil samples were collected via quadrat harvesting method beneath each tree and within the sampling quadrats, respectively. The soil samples were collected by plum blossom sampling method, and 5 sub-samples were collected in a 3m × 3m grid. The impurities such as gravel were removed, and 1.0 kg of mixed samples were left in a polyethylene self-sealing bag and

**Table 1. Morphometric and Geospatial Data of Dominant Tree Species.**

| Dominant Species                | Geospatial Coordinates |              |              | Morphometric Parameters |        | Associated Flora                                                                                                       |
|---------------------------------|------------------------|--------------|--------------|-------------------------|--------|------------------------------------------------------------------------------------------------------------------------|
|                                 | Latitude(N)            | Longitude(E) | Elevation(m) | DBH(cm)                 | Age(a) |                                                                                                                        |
| <i>Acer pseudo-Sieboldianum</i> | 41°19'50"              | 124°54'39"   | 761          | 18                      | 30     | <i>Carpinus cordata</i> , <i>Tilia amurensis</i>                                                                       |
| <i>Carpinus cordata</i>         | 41°19'50"              | 124°54'39"   | 761          | 12                      | 50     | <i>Acer pseudo-Sieboldianum</i> , <i>Tilia amurensis</i>                                                               |
| <i>Tilia amurensis</i>          | 41°19'50"              | 124°54'39"   | 761          | 24                      | 70     | <i>Acer pseudo-Sieboldianum</i> , <i>Carpinus cordata</i>                                                              |
| <i>Acer mono Maxim</i>          | 41°19'49"              | 124°54'38"   | 728          | 8                       | 18     | <i>Carpinus cordata</i> , <i>Sorbus alnifolia</i> , <i>Actinidia kolomikta</i>                                         |
| <i>Ulmus laciniata</i>          | 41°19'56"              | 124°54'45"   | 687          | 4                       | 10     | <i>Acer mono Maxim</i> , <i>Acer pseudosieboldianum</i> , <i>Pinus koraiensis</i> Siebold, <i>Corylus heterophylla</i> |
| <i>Fraxinus mandschurica</i>    | 41°20'05"              | 124°54'52"   | 629          | 30                      | 60     | <i>Spiraea salicifolia</i> , <i>Sambucus williamsii</i>                                                                |
| <i>Quercus mongolica</i>        | 41°18'14"              | 124°53'48"   | 882          | 20                      | 40     | <i>Fraxinus chinensis</i>                                                                                              |
| <i>Acer barbinerve</i>          | 41°18'47"              | 124°53'33"   | 1107         | 14                      | 30     | <i>Fraxinus mandschurica</i> , <i>Sambucus williamsii</i>                                                              |
| <i>Prunus serrulata</i>         | 41°18'47"              | 124°53'33"   | 1109         | 18                      | 30     | <i>Quercus mongolica</i> , <i>Acer ukurunduense</i> , <i>Acer pseudosieboldianum</i>                                   |
| <i>Betula ermanii</i>           | 41°19'05"              | 124°53'16"   | 1255         | 10                      | 70     | <i>Acer pictum</i> Thunb.                                                                                              |
| <i>Abies nephrolepis</i>        | 41°18'47"              | 124°53'33"   | 1109         | 40                      | 110    | <i>Cerasus maximowiczii</i>                                                                                            |
| <i>Pinus koraiensis</i>         | 41°20'06"              | 124°54'49"   | 641          | 18                      | 40     | <i>Acer mono Maxim</i> .                                                                                               |
| <i>Abies holophylla</i>         | 41°20'05"              | 124°54'52"   | 616          | 45                      | 90     | <i>Spiraea salicifolia</i> , <i>Sambucus williamsii</i> , <i>Autumn pear</i>                                           |

This table lists the 13 dominant tree species in the Laotudingzi forest community, including their geospatial coordinates (latitude in °N, longitude in °E, elevation in m), morphometric parameters (diameter at breast height in cm, age in years), and associated flora. It provides a comprehensive overview of species-specific characteristics to support ecological analysis.

<https://doi.org/10.1371/journal.pone.0328983.t001>



labeled. The collected samples were placed in a cool and ventilated place for natural air drying. After drying, they were ground through a 100-mesh nylon sieve, and 150 g of the particle size sample under the sieve was weighed by the quartering method. A total of 13 foliar, 22 litter (shared among clustered *Acer pseudo-Sieboldianum*, *Carpinus cordata*, and *Tilia amurensis*), and 22 soil specimens were processed. Laboratory procedures included oven-drying at 65°C, pulverization using an SM-1 vibratory ball mill (Dandong Yuan Instrument Co., Ltd.), pellet preparation via BP-1 press, and elemental (C, N, P) quantification using a Rigaku ZSX Primus II wavelength-dispersive X-ray fluorescence spectrometer. Soil samples were sieved (<2 mm) and processed identically. Pearson correlations and ANOVA for foliar-litter-soil elemental relationships were performed using IBM SPSS Statistics 26 and Origin 2022, with spatial stoichiometric patterns illustrated in Fig 2.

## 4 Results and analysis

### 4.1 Ecological stoichiometric characteristics of dominant tree species in Laotudingzi paleo-block stream forest

The leaf C content of 13 dominant tree species in the Gushihe forest community ranged from 14.27% to 24.95% (Table 2), with an average of 20.65%, and the coefficient of variation (C.V.) was 19.67%. Moderate variability ( $C.V. \leq 15\%$  is defined as slight variability;  $15\% < C.V. \leq 35\%$  was moderate variation;  $35\% < C.V. \leq 100\%$  was highly variable.  $C.V. \geq 100\%$  is strong variation [19]). Among them, the C content of *Acer mono Maxim*, *Prunus serrulata*, *Pinus koraiensis*, and other 8 tree species was higher than the average, reflecting higher C assimilation capacity; five species such as *Betula ermanii* and *Quercus mongolica* were lower than the mean (Fig 3). The content of C element in the litter under the tree ranged from 24.20% to 26.58%, with an average of about 25.83%, which was a slight variation. The content of C in the soil under the tree ranged from 3.51% to 6.94% (Table 2), with an average of about 4.63%, which belonged to moderate variation.

The leaf N content ranged from 0.52% to 1.40%, with an average of 1.08%, which was significantly lower than the reference value of coniferous and broad-leaved mixed forest in Changbai Mountain (2.03%) [20], and C.V.22.42% was moderate variation. The contents of 8 kinds of N such as *Fraxinus mandschurica* and *Ulmus laciniata* were higher, and the contents of 5 kinds of N such as *Tilia amurensis* and *Pinus koraiensis* were lower. The content of N element in the litter

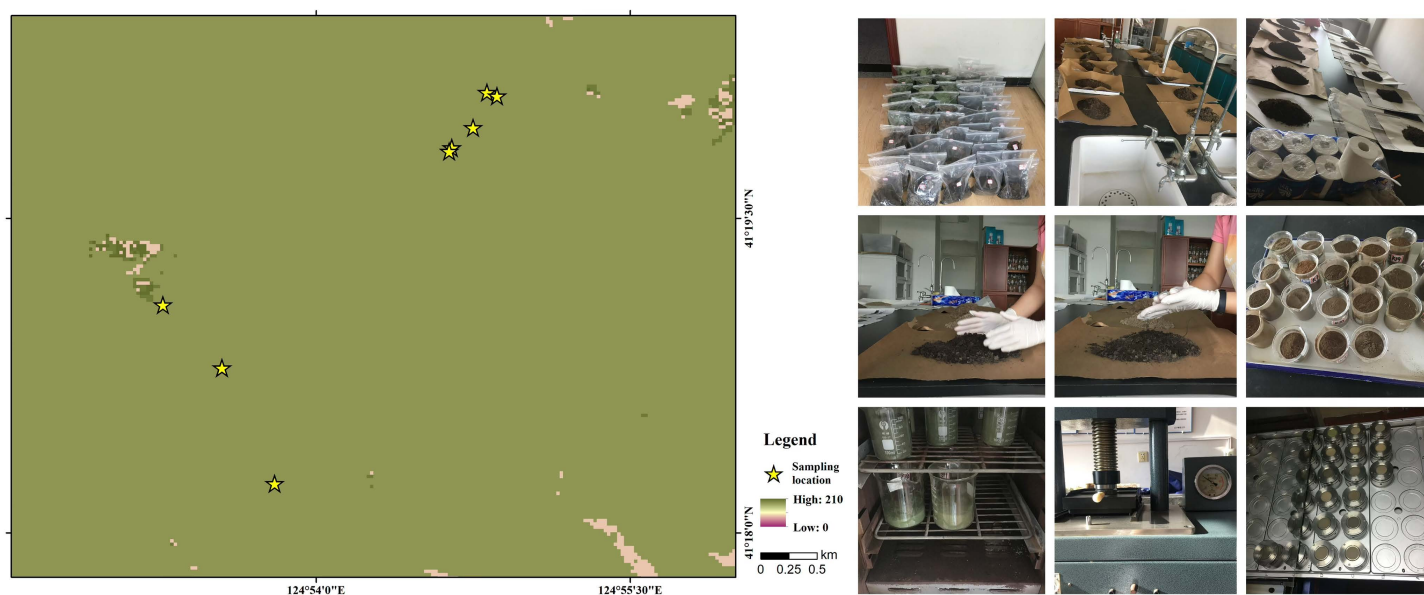

**Fig 2. Sample collection and treatment.** The location of sampling points and laboratory process.

<https://doi.org/10.1371/journal.pone.0328983.g002>

**Table 2. Statistical characteristics of leaf, litter and soil ecological stoichiometry of dominant tree species.**

| Parameter(%)                    |        | C           | N         | P         | C:N         | C:P           | N:P        |
|---------------------------------|--------|-------------|-----------|-----------|-------------|---------------|------------|
| Mean                            | leaf   | 20.65       | 1.08      | 0.09      | 20.75       | 257.76        | 12.84      |
|                                 | litter | 25.83       | 0.86      | 0.08      | 32.31       | 342.88        | 11.25      |
|                                 | soil   | 4.63        | 0.76      | 0.1       | 6.11        | 50.17         | 8.05       |
| Content Range                   | leaf   | 14.27-24.95 | 0.52-1.40 | 0.06-0.15 | 12.44-47.67 | 122.49-427.57 | 7.46-19.26 |
|                                 | litter | 24.20-26.58 | 0.49-1.17 | 0.06-0.12 | 22.13-53.90 | 225.91-461.27 | 6.43-14.01 |
|                                 | soil   | 3.51-6.94   | 0.65-1.02 | 0.08-0.14 | 4.73-8.13   | 32.69-86.05   | 5.91-11.83 |
| CV(%)                           | leaf   | 19.67       | 22.42     | 31.11     | 45.71       | 39            | 26.01      |
|                                 | litter | 2.507       | 24.09     | 21.6      | 33.77       | 20.01         | 25.2       |
|                                 | soil   | 22.42       | 14.12     | 20.97     | 16.28       | 36.14         | 22.58      |
| <i>Acer pseudo-Sieboldianum</i> | leaf   | 14.62       | 0.91      | 0.09      | 16.14       | 170.62        | 10.57      |
|                                 | litter | 26          | 0.93      | 0.07      | 27.97       | 374.4         | 13.39      |
|                                 | soil   | 4.69        | 0.71      | 0.08      | 6.59        | 61.42         | 9.31       |
| <i>Carpinus cordata</i>         | leaf   | 24.67       | 1.09      | 0.08      | 22.7        | 324.7         | 14.31      |
|                                 | litter | 26          | 0.93      | 0.07      | 27.97       | 374.4         | 13.39      |
|                                 | soil   | 4.69        | 0.71      | 0.08      | 6.59        | 61.42         | 9.31       |
| <i>Tilia amurensis</i>          | leaf   | 16.67       | 0.94      | 0.07      | 17.71       | 222.28        | 12.55      |
|                                 | litter | 26          | 0.93      | 0.07      | 27.97       | 374.4         | 13.39      |
|                                 | soil   | 4.69        | 0.71      | 0.08      | 6.59        | 61.42         | 9.31       |
| <i>Acer mono Maxim</i>          | leaf   | 24.95       | 0.89      | 0.07      | 27.94       | 379.63        | 13.59      |
|                                 | litter | 26.09       | 1.02      | 0.07      | 25.54       | 357.73        | 14.01      |
|                                 | soil   | 3.93        | 0.74      | 0.12      | 5.3         | 32.69         | 6.17       |
| <i>Ulmus laciniata</i>          | leaf   | 22.07       | 1.36      | 0.07      | 16.2        | 312.03        | 19.26      |
|                                 | litter | 26.58       | 0.59      | 0.09      | 44.87       | 289.98        | 6.46       |
|                                 | soil   | 5.72        | 1.02      | 0.13      | 5.59        | 42.52         | 7.6        |
| <i>Fraxinus mandschurica</i>    | leaf   | 24.75       | 0.93      | 0.06      | 26.74       | 399.45        | 14.94      |
|                                 | litter | 26.25       | 0.95      | 0.12      | 27.67       | 225.91        | 8.17       |
|                                 | soil   | 3.92        | 0.72      | 0.11      | 5.42        | 34.34         | 6.33       |
| <i>Quercus mongolica</i>        | leaf   | 17.49       | 1.33      | 0.08      | 13.19       | 231.27        | 17.53      |
|                                 | litter | 25.84       | 1.17      | 0.09      | 22.13       | 282.73        | 12.78      |
|                                 | soil   | 3.51        | 0.65      | 0.1       | 5.43        | 34.01         | 6.26       |
| <i>Acer barbinerve</i>          | leaf   | 21.46       | 1.25      | 0.09      | 17.23       | 233.08        | 13.53      |
|                                 | litter | 26.55       | 0.5       | 0.07      | 53.55       | 383.59        | 7.16       |
|                                 | soil   | 4.75        | 0.69      | 0.12      | 6.87        | 40.59         | 5.91       |
| <i>Prunus serrulata</i>         | leaf   | 14.27       | 1.15      | 0.12      | 12.44       | 122.49        | 9.84       |
|                                 | litter | 25.55       | 0.83      | 0.06      | 30.63       | 422.08        | 13.78      |
|                                 | soil   | 6.94        | 0.95      | 0.08      | 7.28        | 86.05         | 11.83      |
| <i>Betula ermanii.</i>          | leaf   | 24.87       | 0.52      | 0.06      | 47.67       | 427.57        | 8.97       |
|                                 | litter | 25.34       | 0.99      | 0.07      | 25.72       | 355.52        | 13.82      |
|                                 | soil   | 6.01        | 0.74      | 0.07      | 8.13        | 80.56         | 9.91       |
| <i>Abies nephrolepis</i>        | leaf   | 17.95       | 1.18      | 0.09      | 15.18       | 206.84        | 13.63      |
|                                 | litter | 25.14       | 0.94      | 0.08      | 26.64       | 313.75        | 11.78      |
|                                 | soil   | 4.16        | 0.7       | 0.11      | 5.91        | 38.42         | 6.5        |
| <i>Pinus koraiensis</i>         | leaf   | 24.56       | 1.1       | 0.15      | 22.29       | 166.33        | 7.46       |
|                                 | litter | 26.23       | 0.49      | 0.06      | 53.89       | 461.26        | 8.56       |
|                                 | soil   | 3.62        | 0.73      | 0.09      | 4.96        | 42.21         | 8.51       |

(Continued)

**Table 2.** (Continued)

| Parameter(%)            |        | C     | N    | P    | C:N   | C:P    | N:P   |
|-------------------------|--------|-------|------|------|-------|--------|-------|
| <i>Abies holophylla</i> | leaf   | 20.04 | 1.4  | 0.13 | 14.36 | 154.61 | 10.77 |
|                         | litter | 24.19 | 0.95 | 0.1  | 25.43 | 241.67 | 9.5   |
|                         | soil   | 3.61  | 0.76 | 0.1  | 4.73  | 36.53  | 7.73  |

This table summarizes mean values, content ranges, and coefficient of variation (CV in %) for carbon (C), nitrogen (N), phosphorus (P) content (in %), and their ratios (C:N, C:P, N:P) across leaf, litter, and soil samples of dominant tree species. It highlights spatial variability and nutrient dynamics to identify biogeochemical patterns in the ecosystem.

<https://doi.org/10.1371/journal.pone.0328983.t002>

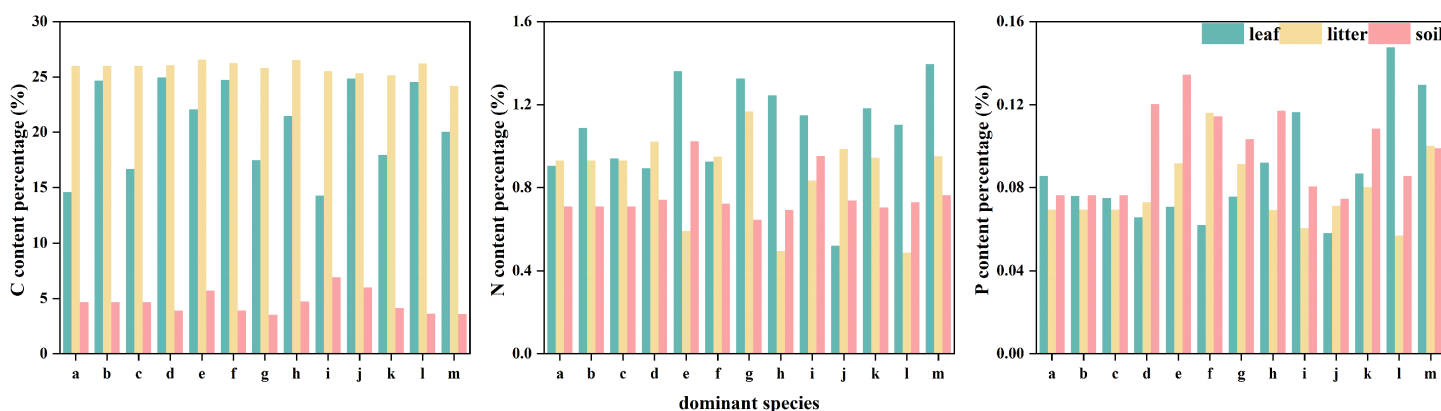

**Fig 3.** The contents of C, N and P in leaves, litter and soil of dominant tree species. Displays bar charts or graphs comparing the concentrations of C, N, and P across leaves, litter, and soil components for the 13 dominant tree species.

<https://doi.org/10.1371/journal.pone.0328983.g003>

under the tree ranged from 0.49% to 1.17%, with an average value of about 0.86%, and the standard deviation rate was 24.09%, which was moderate variation. Among them, the N content of litter under *Abies holophylla*, *Acer barbinerve* and *Ulmus laciniata* was significantly lower than the average level, and there was still a certain degree of opposite relationship between the order of N content and C order. The soil N content ranged from 0.65% to 1.02%, with an average of 0.76%, and the standard deviation was 14.12%, which was a slight variation. Among them, the soil N content of *Abies holophylla*, *Acer barbinerve* and *Ulmus laciniata* was significantly higher than the average level, and there was still a certain degree of similarity between the N element content ranking and the C ranking.

The leaf P content ranged from 0.06% to 0.15%, with an average of 0.09%. Only four species such as *Abies holophylla* and *Fraxinus mandschurica* were higher than the average, and C.V.31.11% reflected moderate spatial heterogeneity, which was significantly lower than the reference value of Changbai Mountain (0.166%) [20]. The content of P element in the litter under the trees ranged from 0.06% to 0.12%, with an average value of about 0.08%. Among them, *Pinus koraiensis*, *Fraxinus mandschurica*, *Ulmus laciniata*, *Quercus mongolica* and *Betula ermanii* were higher than the average content level in turn, and the standard deviation rate was 21.60%, which was still moderate variation. From the element content and variation level of the litter under the tree, it can be seen that the plant has a good reabsorption capacity for litter nutrient elements. The content of P element in soil ranged from 0.08% to 0.14%, with an average of 0.10%. Among them, *Ulmus laciniata*, *Acer mono Maxim*, *Acer barbinerve*, *Pinus koraiensis*, *Betula ermanii*, *Quercus mongolica* and *Fraxinus mandschurica* were higher than the average content level in turn, with a standard deviation rate of 20.97%, which was still moderate variation.

The ecological stoichiometric ratio showed that the leaf C: N of the dominant species in the ancient stone river of Laotudingzi ranged from 12.44 to 47.67 (Table 2), with an average value of 20.75 (lower than the ratio of 24.7 of the same order in Changbai Mountain [20]), and the standard deviation rate was 45.71, which belonged to high variation. Among them, the C: N of *Betula ermanii*, *Acer mono Maxim*, *Fraxinus mandschurica*, *Carpinus cordata* and *Pinus koraiensis* were higher than the average level. The C: N of litter layer ranged from 22.13 to 53.90, with an average of 32.31 and a standard deviation of 33.77, which belonged to moderate variation. Among them, the C: N ratio of litter decomposition layer under *Pinus koraiensis* and *Acer barbinerve* was more than 50. The C: N ratio in the soil layer under the trees ranged from 4.73 to 8.13, with an average of 6.11 and a standard deviation of 16.28, which was moderate variation.

Leaf C: P ranged from 122.49 to 427.57, with an average of 257.76. The order of C: P of different dominant tree species from high to low was: *Betula ermanii* > *Fraxinus mandschurica* > *Acer pictum* Thunb > *Carpinus cordata* > *Ulmus laciniata* > *Acer barbinerve* > *Quercus mongolica* > *Tilia amurensis* > *Betula ermanii* > *Acer pseudo-Sieboldianum* > *Pinus koraiensis* > *Abies holophylla* > *Prunus serrulata*. The standard deviation is 39.00, which is a high degree of variation. Litter C: P ranged from 225.91 to 461.27, with an average of 342.88. Litter C: P ranged from 32.69 to 86.05, with an average of 50.17.

Leaf N: P ranged from 7.46 to 19.26, with an average value of 12.84, which was slightly lower than the average level of 321 and 13 in the adjacent Changbai Mountains [20], and also lower than the average level of forest communities in eastern China (313.9) [21], reflecting that the absorption efficiency of P by Gushihe vegetation in Laotudingzi was higher, and plant growth was mostly affected by N and P elements. The order of N: P of different dominant tree species from high to low was: *Ulmus laciniata* > *Quercus mongolica* > *Fraxinus mandschurica* > *Carpinus cordata* > *Abies nephrolepis* > *Acer mono Maxim* > *Acer barbinerve* > *Tilia amurensis* > *Abies holophylla* > *Acer pseudo-Sieboldianum* > *Prunus serrulata* > *Betula ermanii* > *Pinus koraiensis*. The standard deviation rate was 26.01, which belonged to moderate variation. It reflects that the nutrient acquisition of plants has good stability, and there are some differences in the ratio of the three elements among different dominant tree species. Litter N: P ranged from 6.46 to 14.01, with an average of 11.25. Soil N: P ranged from 5.91 to 11.83, with an average of 8.05.

#### 4.2 Ecological stoichiometric relationships between foliar and litter in Laotudingzi paleo-block stream forest

Correlation analysis between foliar C, N, P content (and ratios) and litter elemental composition revealed no statistically significant correlations between foliar and litter elemental concentrations (Fig 4). There was also a significant negative correlation between leaf N: P and litter C: P ( $P < 0.05$ ), and the correlation coefficient was  $R = -0.581$  (Fig 5). The N: P ratio of plant leaves can reflect the N and P nutrient limitation pattern of plant growth process, and the P element of litter under the tree is the limiting element of plants in this area.

#### 4.3 Ecological stoichiometric relationships between foliar and soil in Laotudingzi paleo-block stream forest

Correlation analysis revealed no statistically significant linear relationships between foliar elemental content and underlying soil elemental composition in the Laotudingzi forest community (Fig 6). There was also a significant negative linear correlation between leaf N: P and soil C: N under the tree ( $P < 0.05$ ), and the correlation coefficient  $R = -0.558$ ; there was also a significant negative correlation with soil C: P under the tree ( $P < 0.1$ ), and the correlation coefficient  $R = -0.486$ , the correlation was not strong (Fig 7). The increase of plant N content or N: P ratio can reflect the good growth of plants, while the soil C: N, C: P ratio is small, or the P content is higher, which usually indicates that the nutrient cycle rate of the soil environment is faster. The two promote each other to achieve the stable growth of plants.

#### 4.4 Ecological stoichiometric relationships between litter and soil in Laotudingzi paleo-block stream forest

Correlation analysis revealed a significant positive linear correlation between litter P content and soil P content beneath dominant tree species ( $R = 0.538$ ,  $P < 0.1$ ; Fig 8). Additionally, litter N: P ratio exhibited a significant positive linear



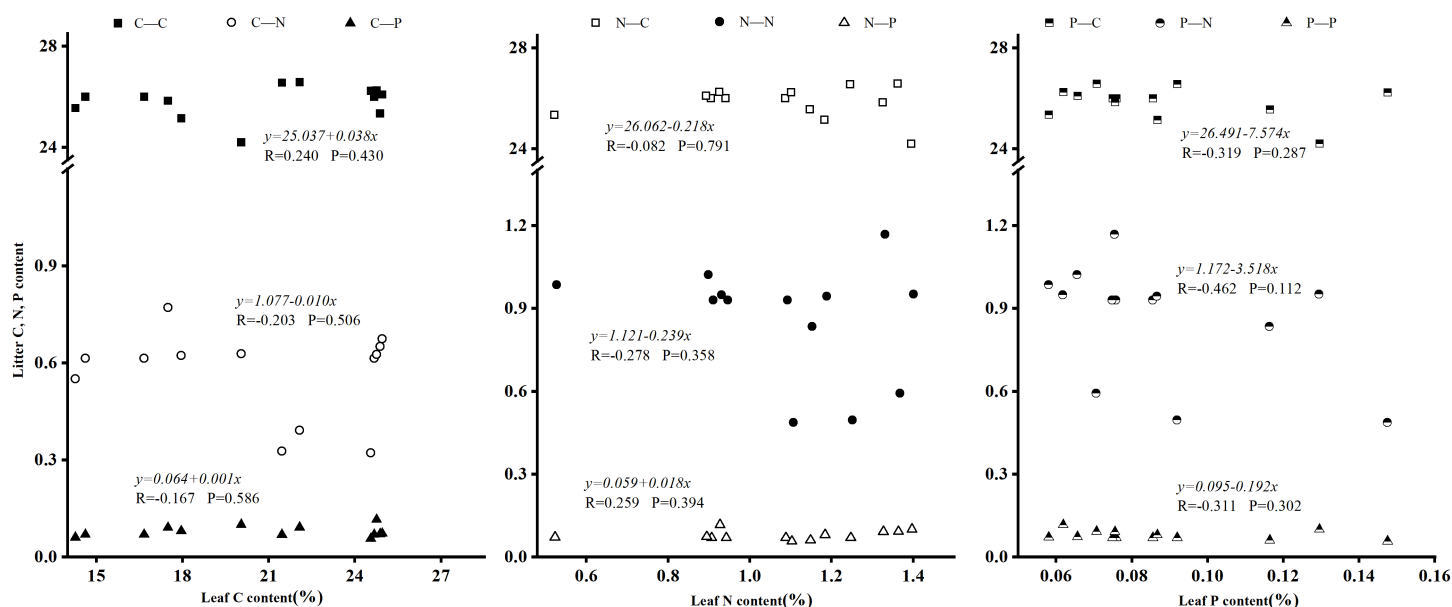

**Fig 4. Relationship between leaf element content and litter element content of dominant species.** Presents a scatter plot or diagram demonstrating correlations between elemental concentrations (C, N, P) in leaves and litter for dominant species, based on statistical analyses like Pearson correlation.

<https://doi.org/10.1371/journal.pone.0328983.g004>

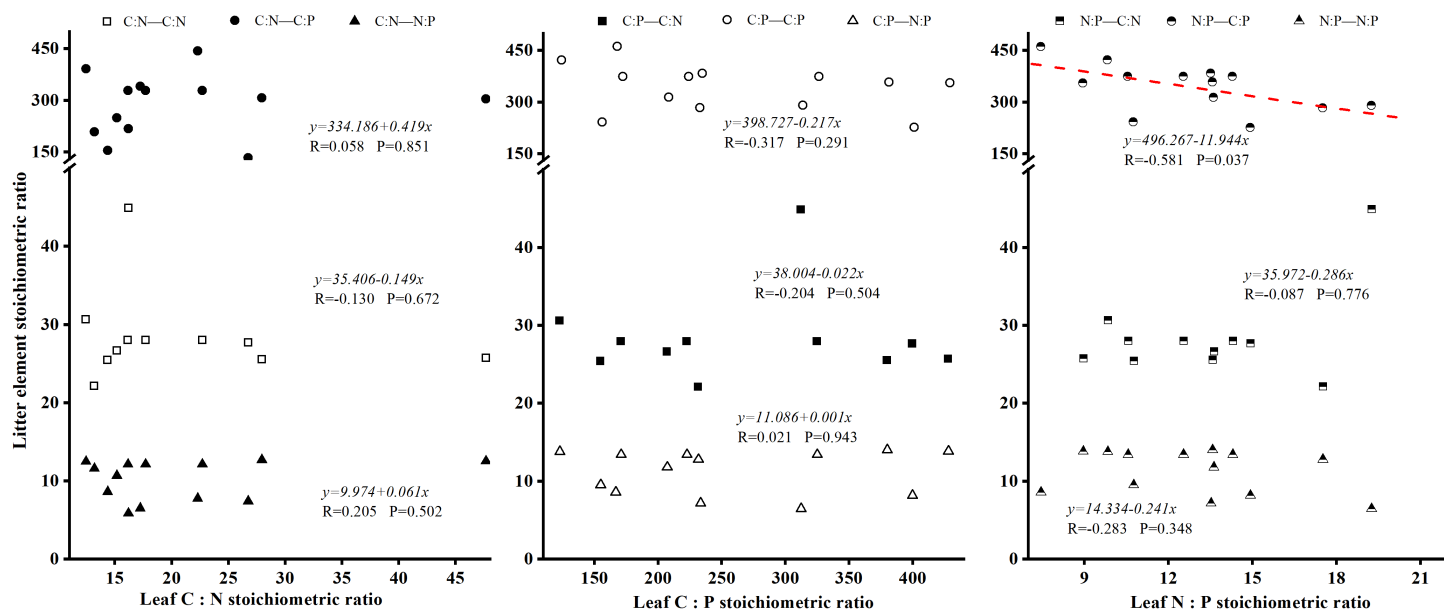

**Fig 5. Relationship between leaf element stoichiometry of dominant species and litter element stoichiometry.** Features a scatter plot showing how stoichiometric ratios (e.g., C:N, C:P, N:P) in leaves correlate with those in litter, emphasizing trends such as significant negative correlations.

<https://doi.org/10.1371/journal.pone.0328983.g005>

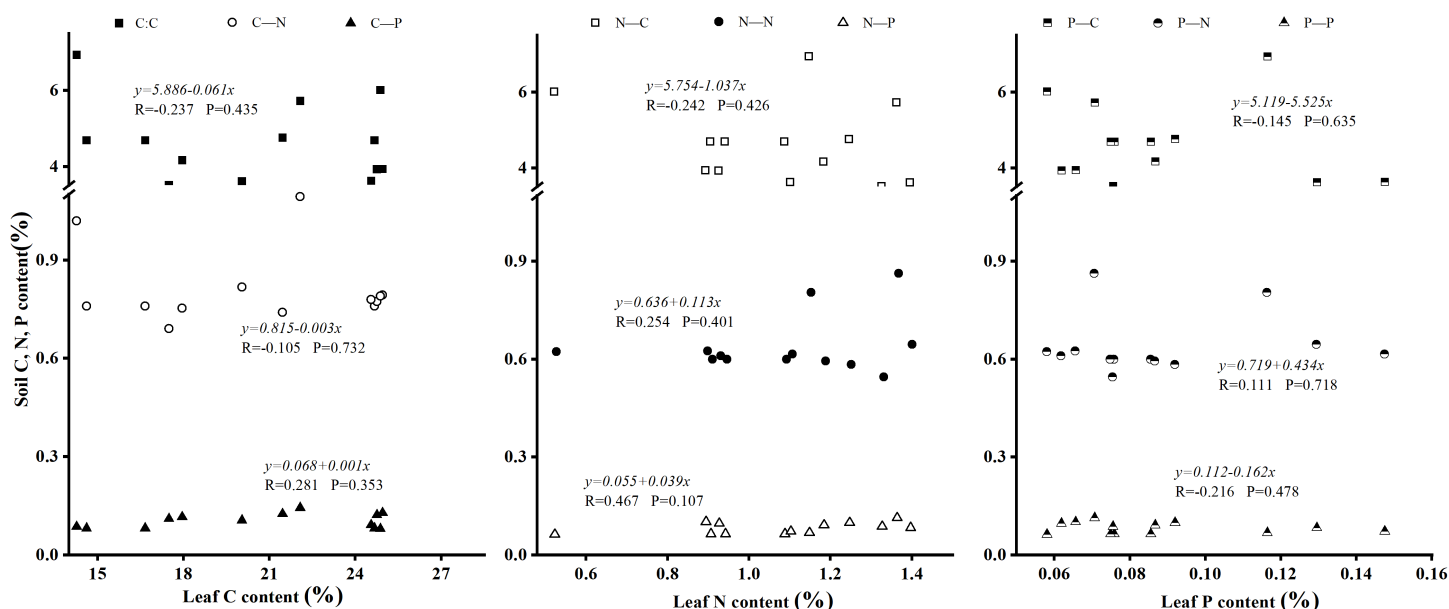

**Fig 6. Relationship between leaf element content of dominant species and soil element content.** Scatter plot depicting the relationship between leaf element content and soil element content.

<https://doi.org/10.1371/journal.pone.0328983.g006>

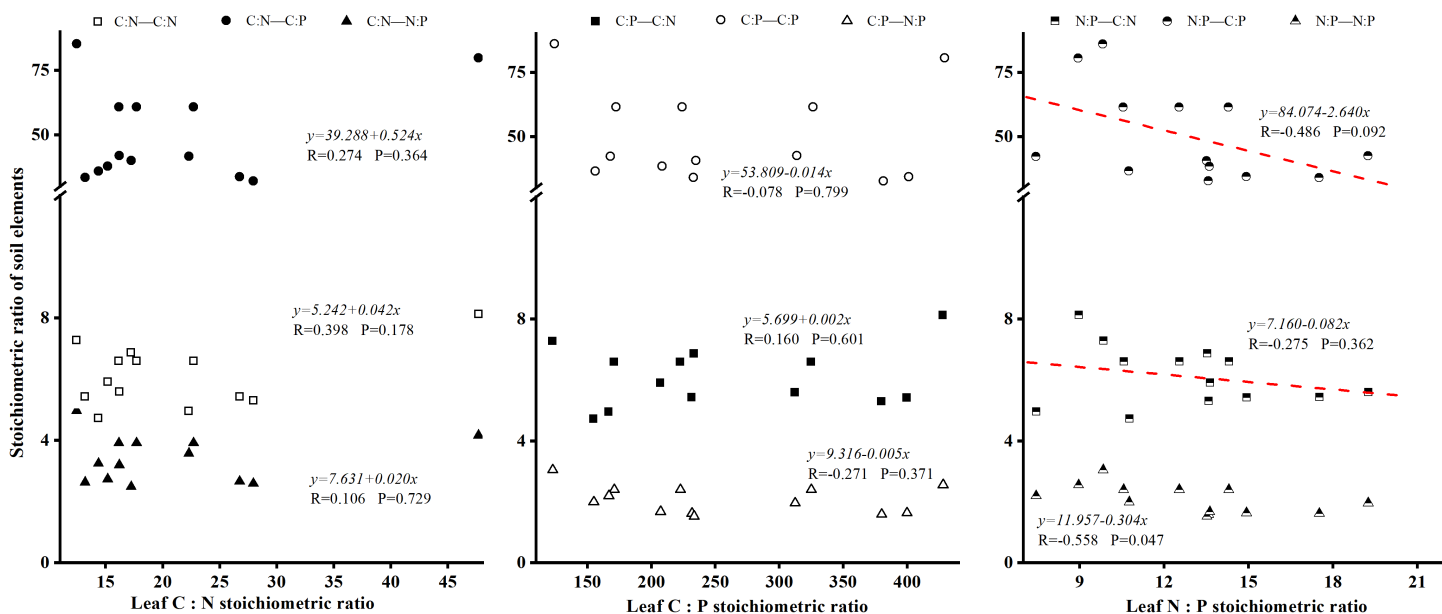

**Fig 7. Relationship between leaf element stoichiometry of dominant species and soil element stoichiometry.** Shows a scatter plot illustrating how leaf stoichiometric ratios (e.g., N:P) relate to soil ratios (e.g., C:N, C:P), including significant negative correlations identified.

<https://doi.org/10.1371/journal.pone.0328983.g007>

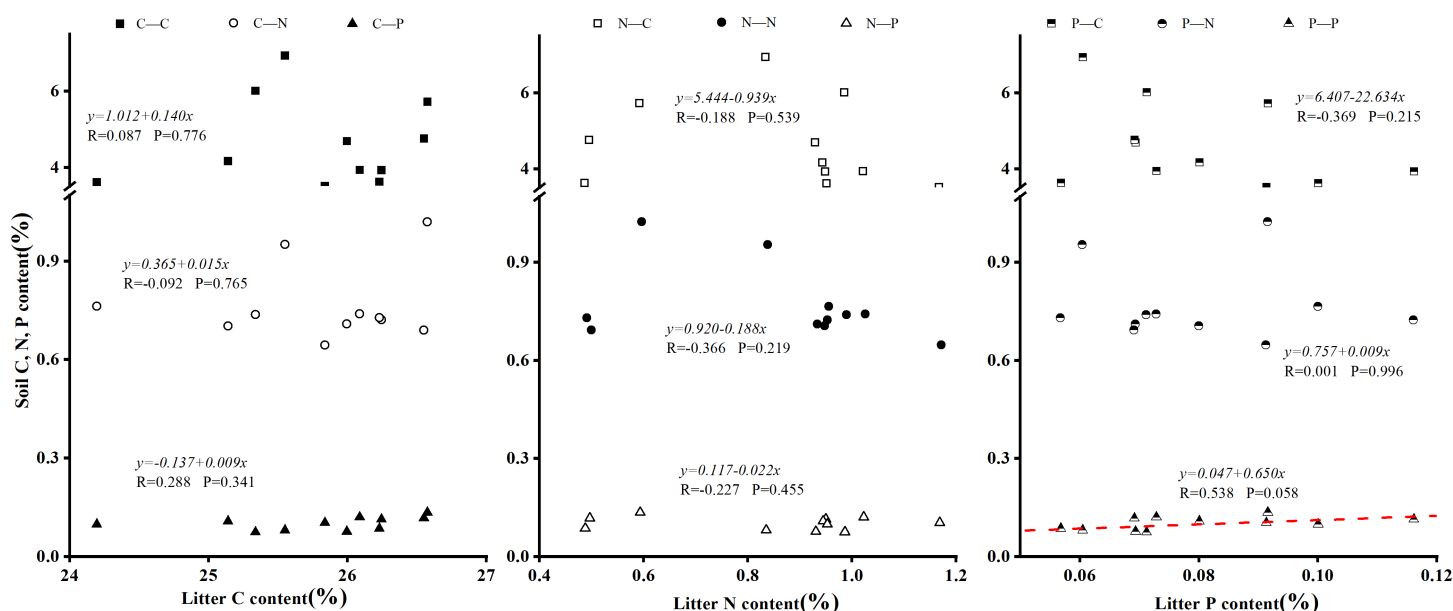

**Fig 8. Relationship between litter element content and soil element content.** Displays a scatter plot highlighting correlations, particularly for phosphorus (P), between litter and soil elemental concentrations, with significant positive trends observed.

<https://doi.org/10.1371/journal.pone.0328983.g008>

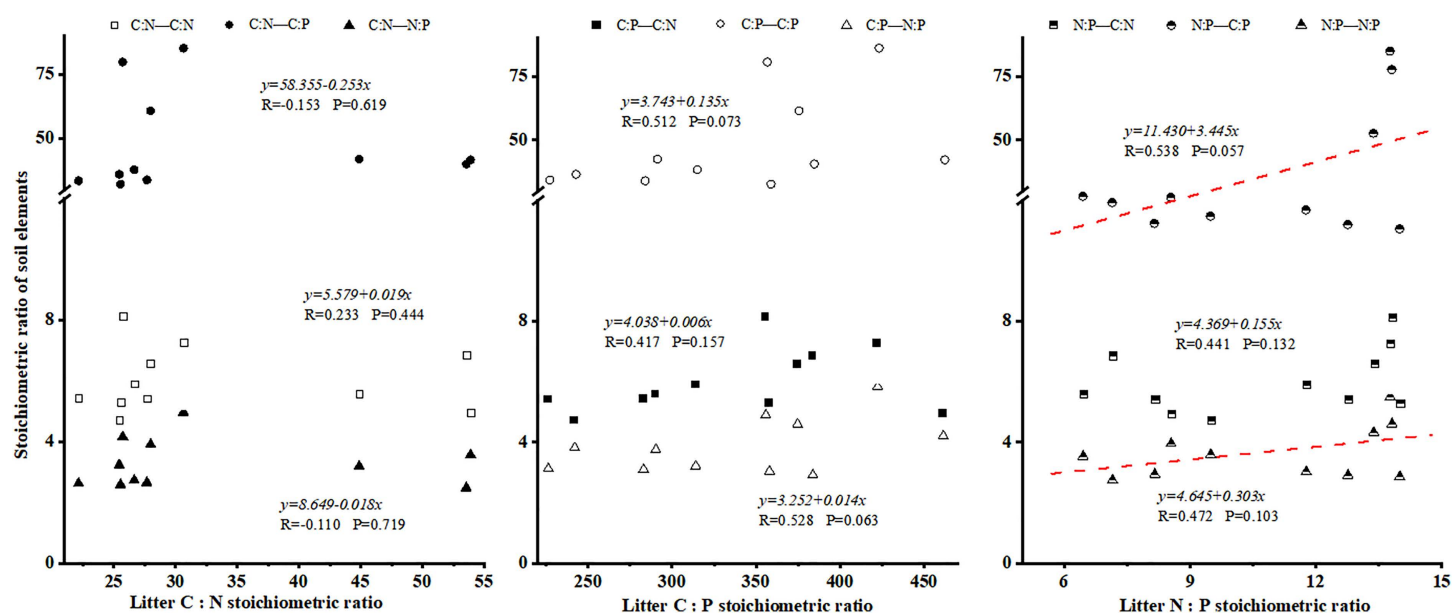

**Fig 9. Relationship between litter element stoichiometry and soil element stoichiometry.** Features a scatter plot demonstrating how stoichiometric ratios in litter (e.g., N:P) correlate with those in soil (e.g., C:P), showing positive but non-significant trends in the data.

<https://doi.org/10.1371/journal.pone.0328983.g009>

correlation with soil C: P ratio ( $R=0.538$ ,  $P<0.1$ ; Fig 9). A positive but non-significant trend was observed between litter N: P ratio and soil N: P ratio ( $R=0.472$ ,  $P=0.103$ ). These findings indicate that P is the limiting element for vegetation growth in this region. Notably, the synchronized dynamics between fully decomposed litter layer (Oa horizon) P content and soil layer (B horizon) P content suggest tight nutrient coupling during biogeochemical cycling, where litter decomposition directly regulates soil P availability through mineralization-immobilization turnover.

## 5 Discussion

This study revealed the biogeochemical cycle characteristics and driving mechanism of C, N and P elements in the forest ecosystem of Laotudingzi ancient periglacial landform in eastern Liaoning. From the perspective of geography, the interaction between the unique periglacial geomorphological environment and the temperate monsoon climate in the region has jointly shaped a special element cycle pattern [22]. The rock debris accumulation of the ancient periglacial landform leads to the slow soil formation process. The P in the granite parent material mainly exists in the form of insoluble secondary phosphate [23], and the runoff coefficient of the slope is as high as 70% [11], resulting in strong leaching of P. This is consistent with the research conclusions of other periglacial regions in the world [24], but the soil P content in this area is significantly lower than that in the above regions [25], reflecting the stronger hydrological erosion effect in the East Asian monsoon region. It is worth noting that the elevation gradient has a nonlinear regulation on the distribution of P: in the periglacial core zone above 1100 m, freeze-thaw promotes the development of rock fissures, but accelerates the chemical weathering of primary minerals [26], which explains the phenomenon of relatively high P content in the soil under the *Abies nephrolepis* forest. Plants achieve niche complementarity through life form differentiation. Broad-leaved tree species (such as *Fraxinus mandshurica*) adopt the ‘rapid cycle’ strategy, and their leaf N: P is close to the Redfield ratio [27], and the litter P return is significantly higher than that of coniferous trees, which is similar to the element cycle model of low-altitude warm temperate deciduous forests [28]. Coniferous tree species (such as *Pinus koraiensis*) adopt a ‘conservative storage’ strategy to delay decomposition and reduce nutrient loss through high C: N litter, similar to the characteristics of the cold temperate taiga forest [29]. This life form differentiation forms a ‘nutrient cycling coupling chain’ on the vertical band spectrum, which is significantly different from the vertical band structure of vegetation in Changbai Mountain [30], reflecting the marginal effect of the transition from North China flora to Changbai Mountain flora. It is recommended to adopt the ‘landform-vegetation collaborative restoration’ model: deep-rooted tree species (such as *Ulmus pumila*) are preferentially planted in the active zone of the periglacial zone, and their roots can penetrate the debris layer to promote soil formation [31]. The broad-leaved-coniferous mixed forest was constructed on the slope skirt, and the soil structure was improved by using the complementary litter traits [32]. Future research needs to combine stable isotope ( $\delta^{15}\text{N}$ ,  $\delta^{13}\text{C}$ ) tracer technology [33] to quantify the element migration flux in different geomorphological sites.

These findings have critical implications for managing cold-temperate montane ecosystems under global climate change. The identified P limitation ( $\text{N: P} < 14$ ) suggests that future warming may exacerbate nutrient constraints by accelerating organic matter decomposition while P weathering remains slow. To enhance ecosystem resilience, management strategies should prioritize: For the active periglacial zone, it is recommended to restore deep-rooted species (such as *Ulmus laciniata* and *Fraxinus mandshurica*) to enhance bedrock weathering and debris stabilization, promote soil formation processes, and maintain low C: P litter-driven phosphorus cycle efficiency. At the same time, it is necessary to establish a soil C: N: P stoichiometric ratio monitoring system (trigger warning when  $\text{N: P} < 14$ ) to cope with the risk of nutrient imbalance caused by accelerated decomposition of organic matter and delayed weathering of P caused by warming. Management measures should give priority to protecting the structure of mixed forests, avoiding the destruction of stoichiometric balance by coniferous pure forests with high C: N litter, and alleviating phosphorus loss caused by hydrological erosion by retaining the litter layer in the periglacial zone. In addition, microbial-mediated phosphorus cycling mechanisms (such as phosphatase activity and mycorrhizal networks) need to be integrated to enhance the biogeochemical resilience of ecosystems to climate warming. These strategies together constitute a ‘weathering-vegetation-microorganism’

synergistic regulatory framework, which can effectively alleviate the P limitation of low-temperature forests and enhance landscape stability.

## 6 Conclusions

This study systematically investigated the ecological stoichiometric characteristics of 13 dominant tree species in the Laotudingzi paleo-block stream forest community (Liaodong Mountains, China) through X-ray fluorescence spectroscopy (XRF) and geostatistical analyses. The results revealed distinct biogeochemical patterns across foliar, litter, and soil components.

- (1) The N: P ratios (mean values were 12.84, 11.25, and 8.05, respectively) of leaves, litter, and soil in the ancient Shihe forest community were lower than the global P limitation threshold (N: P < 14), confirming that P is the primary limiting factor for the ecosystem, which is closely related to the low P weathering rate caused by the poor matrix of the periglacial landform (granite parent material, low soil layer thickness). Coniferous species reduced nutrient loss by slowing down decomposition through high C: N litter, while broad-leaved species supplemented soil P pool by efficient return of litter P, reflecting the adaptive strategies of different life forms to P limitation.
- (2) Soil C: N and C: P ratios significantly affected nutrient dynamics: low C: N soil promoted N mineralization and increased plant N uptake (leaf N content 1.02%), while high C: P soil led plants to adapt to low P environment by increasing N: P (mean 8.05), forming a negative feedback mechanism to maintain system homeostasis.
- (3) The positive correlation between litter P and soil P reflected the efficient transfer of P at the decomposition interface, while the negative correlation between leaf N: P and soil N: P was due to the preferential allocation of resources to P acquisition by plants when N was sufficient. The high C: N litter of coniferous tree species inhibited decomposition to adapt to barren habitats, while the broad-leaved tree species increased soil fertility through rapid turnover of litter, and the two synergistically maintained community diversity.
- (4) This study has important implications for the ecological restoration of periglacial landforms. It is recommended to give priority to the introduction of tree species with high P use efficiency (such as *Ulmus laciniata*) and promote P cycle through litter management (such as retaining broad-leaved litter). In the future, it is necessary to further reveal the biological driving mechanism of litter decomposition in combination with microbial community analysis.

## Supporting information

**S1 Data. Data.**  
(XLSX)

## Author contributions

**Conceptualization:** Daqi Liu.

**Writing – review & editing:** Lan Wang.

## References

1. Chen GS, Zeng DH, Chen FS, Fan ZP, Geng HD. A research review on “fertile islands” of soils under shrub canopy in arid and semi-arid regions. *Chinese J Appl Ecol*. 2003;(12):2295–300.
2. Yang K, Huang JH, Dong D. Canopy leaf N and P stoichiometry in grassland communities of Qinghai-Tibetan Plateau, China. *Chin J Plant Ecol*. 2010;34(1):17–22.
3. Wang SQ, Yu GR. Ecological stoichiometry characteristics of ecosystem carbon, nitrogen and phosphorus elements. *Acta Ecologica Sinica*. 2008;08(08):3937–47.



4. Duan BX. Controls on and patterns of soil greenhouse gases fluxes along a typical secondary forest succession sequence in Daxing'an Mountains. Northeast Forestry University; 2023.
5. Meng W, Chang L, Qu Z, Liu B, Liu K, Zhang Y, et al. Dominant Tree Species and Litter Quality Govern Fungal Community Dynamics during Litter Decomposition. *J Fungi (Basel)*. 2024;10(10):690. <https://doi.org/10.3390/jof10100690> PMID: 39452642
6. Zeng X, Gao H, Wang R, Majcher BM, Woon JS, Wenda C, et al. Global contribution of invertebrates to forest litter decomposition. *Ecol Lett*. 2024;27(4):e14423. <https://doi.org/10.1111/ele.14423> PMID: 38584578
7. Piazza M-V, Mazía N, Kitzberger T, Chaneton EJ. Chronic insect herbivores accelerate litter decomposition and nutrient recycling rates along an environmental/herbivory gradient in northern Patagonia. *Forest Ecol Manag*. 2021;479:118534. <https://doi.org/10.1016/j.foreco.2020.118534>
8. Hyvonen R, Agren GI, Bosatta E. Predicting long-term soil carbon storage from short-term information. *Soil Science Society of America Journal*. 1998;62(4):1000.
9. Nie YL, Luo QH, He M, Zhang ZX. Ecological stoichiometry of C, N, P of plant—soil between two *Elaeagnus angustifolia* forests in saline-alkaline land in the middle and lower reaches of Tarim River. *Bull Bot Res*. 2025;45(1):45–56.
10. Zhang H, Liu JG, Fu J, Sun YM, Luo X, He H. Plant community types and basic characteristics in the periglacial areas of the Mt. Laotudingzi, eastern Liaoning mountainous regions. *J Glaciol Geocryol*. 2015;37(02):500–10.
11. Liu JG, Zhang H, Zhu XX, Zhu Y, He H, Liu YG, et al. Grain Size and Geochemical Characteristics of Overlying Soil on Periglacial Landforms in Eastern Liaoning. *Res Soil Water Conserv*. 2015;22(05):331–5.
12. Zhang H, Zhang HS, Fu J, He H, Zhu YP, Wang Y, et al. Habitat characteristics of endangered plant *Diplandrorchis sinica* population in Mt. Laotudingzi of eastern Liaoning province. *J Liaon Normal Univ (Nat Sci Edit)*. 2014;37(03):389–95.
13. Zhu Y, Zhang H, Zhu XX, Liu JG, Zhu YP, Lv R, et al. The characteristics and heterogeneities of soil-plant system of rock slope topography in Laotudingzi Mountain. *Ecol Sci*. 2017;36(02):68–75.
14. Gao LW, Zhang HL, Zha TG. Ecological stoichiometric characteristics of soil indifferent vegetation restoration stages in loess region of western Shanxi Province. *Res Soil Water Conserv*. 2025;32(1):30–8, 47.
15. Li SQ, Guo CT. Studies on the vegetation of Laotudingzi National Nature Reserve, Liaoning Province. *Forest Ecol Sci*. 2003;(02):131–5.
16. Yang Y, Luo Y, Finzi AC. Carbon and nitrogen dynamics during forest stand development: a global synthesis. *New Phytol*. 2011;190(4):977–89. <https://doi.org/10.1111/j.1469-8137.2011.03645.x> PMID: 21323927
17. Yi LJ, Zhang H, Hou R, Xiong DY, He H, Liu YG, et al. Surface soil characteristics of different vegetation types of ancient block stream-periglacial landform at mountain areas in eastern Liaoning province. *Bullet Soil Water Conserv*. 2017;37:7–16.
18. Zhou X, Talley M, Luo Y. Biomass, Litter, and Soil Respiration Along a Precipitation Gradient in Southern Great Plains, USA. *Ecosystems*. 2009;12(8):1369–80. <https://doi.org/10.1007/s10021-009-9296-7>
19. Kobierski M, Długosz J, Piotrowska-Długosz A. Determination of spatial variability of some magnesium forms in Phaeozem using geostatistical methods. *J Elem*. 2014;(1/2014). <https://doi.org/10.5601/jelem.2014.19.1.604>
20. Wang JY, Wang SQ, Li RL, Yan JH, Sha LQ, Han SJ. C: N: P stoichiometric characteristics of four forest types' dominant tree species in China. *Chinese J Plant Ecol*. 2011;35(06):587–95.
21. Jiang PPC. Stoichiometry of tree, shrub, herb leaves and litter in forest ecosystem of Shaanxi Province. Northwest A&F University; 2016.
22. Ballantyne CK. Periglacial landforms | Paraglacial geomorphology. *Encyclopedia of Quaternary Science*. 2007;:2170–82.
23. Vitousek P, Chadwick O, Matson P, Allison S, Derry L, Kettley L, et al. Erosion and the Rejuvenation of Weathering-derived Nutrient Supply in an Old Tropical Landscape. *Ecosystems*. 2003;6(8):762–72. <https://doi.org/10.1007/s10021-003-0199-8>
24. Egli M, Wernli M, Burga C, Kneisel C, Mavris C, Valboa G, et al. Fast but spatially scattered smectite-formation in the proglacial area Morteratsch: An evaluation using GIS. *Geoderma*. 2011;164(1–2):11–21. <https://doi.org/10.1016/j.geoderma.2011.05.001>
25. Dümig A, Smittenberg R, Kögel-Knabner I. Concurrent evolution of organic and mineral components during initial soil development after retreat of the Damma glacier, Switzerland. *Geoderma*. 2011;163(1–2):83–94. <https://doi.org/10.1016/j.geoderma.2011.04.006>
26. Anderson SP, Drever JI, Frost CD, Holden P. Chemical weathering in the foreland of a retreating glacier. *Geochimica et Cosmochimica Acta*. 2000;64(7):1173–89. [https://doi.org/10.1016/s0016-7037\(99\)00358-0](https://doi.org/10.1016/s0016-7037(99)00358-0)
27. Redfield AC. The biological control of chemical factors in the environment. *Sci Prog*. 1960;11:150–70. PMID: 24545739
28. Wang ZQ, Wang QC. The spatial heterogeneity of soil physical properties in forests. *Acta Ecologica Sinica*. 2000;(06):945–50.
29. Hobbie SE, Gough L. Foliar and soil nutrients in tundra on glacial landscapes of contrasting ages in northern Alaska. *Oecologia*. 2002;131(3):453–62. <https://doi.org/10.1007/s00442-002-0892-x> PMID: 28547718
30. Jiang J. Topographic variation of forest phenology and canopy leaf area index in Changbai Mountain. Liaocheng University; 2023.
31. Gysels G, Poesen J, Bochet E, Li Y. Impact of plant roots on the resistance of soils to erosion by water: a review. *Prog Phys Geog*. 2005;29(2):189–217. <https://doi.org/10.1191/0309133305pp443ra>
32. Prescott CE. Litter decomposition: what controls it and how can we alter it to sequester more carbon in forest soils? *Biogeochemistry*. 2010;101(1–3):133–49. <https://doi.org/10.1007/s10533-010-9439-0>
33. Hogberg P. Tansley review no. 95: 15N natural abundance in soil-plant systems. *New Phytologist*. 1998;139(3):595.
